# Supplementary material for: Lipid Droplet Formation Is Regulated by Ser/Thr Phosphatase PPM1D via Dephosphorylation of Perilipin 1
Source: MDPI journal article supplement (doi:10.3390/ijms231912046), 2022-10-10
Supplement: s1 [file s1]

# Lipid Droplet Formation is Regulated by Ser/Thr Phosphatase PPM1D via Dephosphorylation of Perilipin 1

Rui Kamada <sup>1,\*†</sup>, Sae Uno <sup>1,†</sup>, Nozomi Kimura <sup>1</sup>, Fumihiko Yoshimura <sup>2</sup>, Keiji Tanino <sup>3</sup> and Kazuyasu Sakaguchi <sup>1,\*</sup>

<sup>1</sup> Laboratory of Biological Chemistry, Department of Chemistry, Faculty of Science, Hokkaido University, Sapporo 060-0810, Japan

<sup>2</sup> School of Pharmaceutical Sciences, University of Shizuoka, Shizuoka 422-8526, Japan

<sup>3</sup> Laboratory of Organic Chemistry II, Department of Chemistry, Faculty of Science, Hokkaido University, Sapporo 060-0810, Japan

\* Correspondence: kamadar@sci.hokudai.ac.jp (R.K.); kazuyasu@sci.hokudai.ac.jp (K.S.)

† These authors contributed equally to this work.

## Contents:

Figure S1. Fluorescence probe TAP-2CY4E1 specifically stained lipid droplets

Figure S2. TAP-2CY4E1 staining of PPM1D-inhibited mature 3T3-L1 adipocytes with PPM1D inhibition.

Figure S3. Western blot analysis of perilipin 1 after 7 days of treatment of SL-176 in mature 3T3-L1 white adipocytes.

Figure S4. Effects of PPM1D inhibitor SL-176 on perilipin 1 mutants.

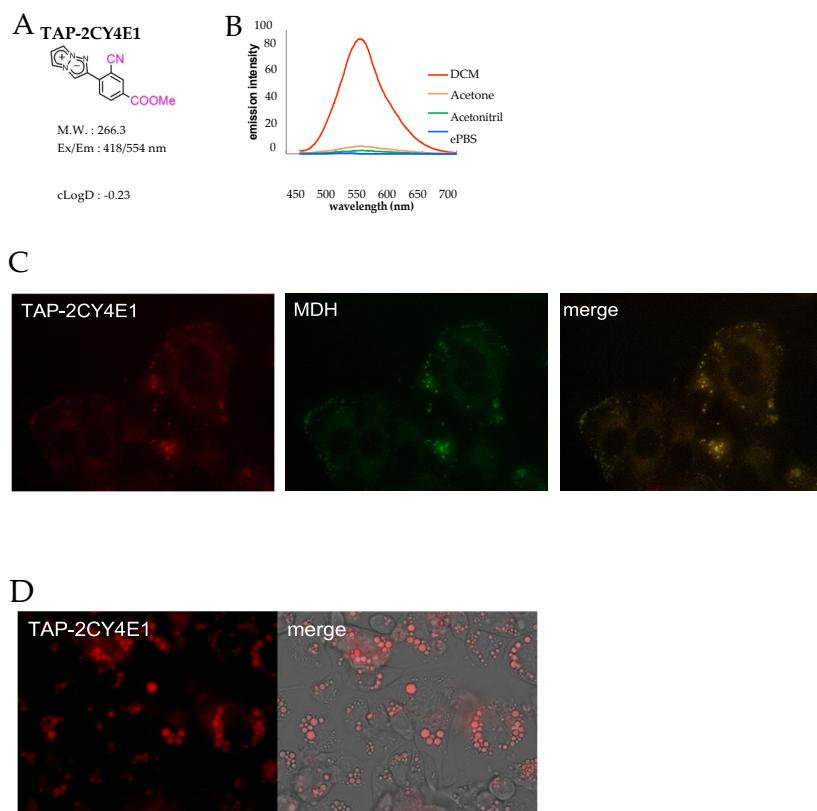

**Figure S1.** Fluorescence probe TAP-2CY4E1 specifically stained lipid droplets (A) Chemical structure of the 1,3a,6a-triazapentalene derivative TAP-2CY4E1 [compound 1e, [29]]. (B) Fluorescence emission spectra of TAP-2CY4E1 (10  $\mu$ M) in aqueous and organic solvents. TAP-2CY4E1 showed strong fluorescence in dichloromethane (DCM), which is a hydrophobic organic solvent. (C) Co-staining with the lipid droplet probes MDH and TAP-2CY4E1. Human lung

cancer-derived A549 cells were treated with 10  $\mu$ M of TAP-2CY4E1 (red) and 10  $\mu$ M MDH (green), and confocal luminescence images of living A549 cells were observed using fluorescence microscopy. TAP-2CY4E1 showed the same pattern as the lipid droplet probe MDH, showing strong fluorescent signals in lipid droplets. This result indicates that TAP-2C4E1 is a selective lipid droplet probe. (D) Fluorescent staining of differentiated 3T3-L1 adipocytes by TAP- 2CY4E1 (10  $\mu$ M). "Merge" represents the merged image of TAP-2CY4E1 (TRITC filter) image and transmitted light image. This result revealed that the lipid droplets of adipocytes could be visualized using the fluorescent probe.

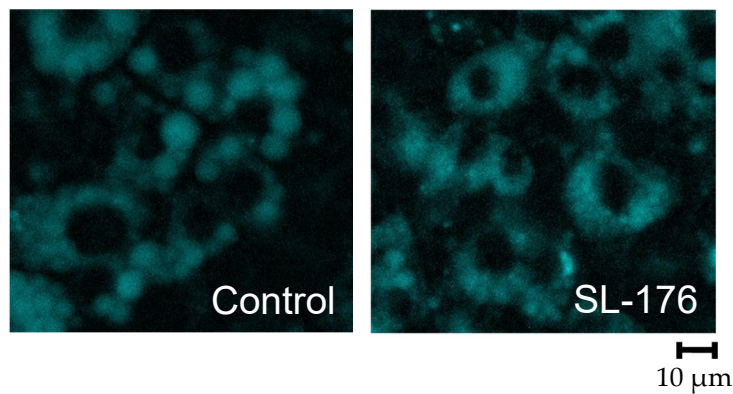

**Figure S2. TAP-2CY4E1 staining of mature 3T3-L1 adipocytes with PPM1D inhibition.** Lipid droplet imaging of PPM1D-inhibited mature 3T3-L1 adipocytes using TAP- 2CY4E1. After differentiation for 8 days followed by treatment with SL-176 for 7 days, the cells were stained with TAP-2CY4E1. TAP-2CY4E1 can visualize lipid droplets in living cells by simply adding a probe to the cell culture media. After observation under a fluorescent microscope, TAP-2CY4E1 was removed by washing the cells, which could then be used for another biological assay.

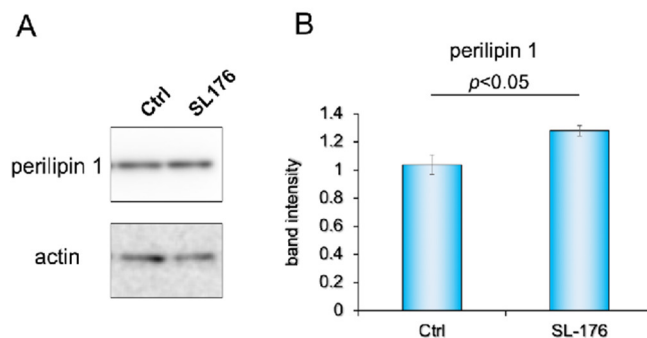

**Figure S3. Western blot analysis of perilipin 1 after 7 days of treatment of SL-176 in mature 3T3-L1 white adipocytes.**

(A) Representative pictures of perilipin 1 and actin expressions in the mock- and SL-176- treated mature 3T3-L1 white adipocytes for 7 days. (B) Bar graphs of perilipin 1 expression levels normalized to actin. Data represents the mean  $\pm$  S.D. of three independent experiments. Significance was analyzed by using Student t-test.

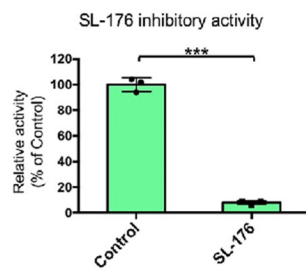

**Figure S4.** Effects of PPM1D inhibitor SL-176 on perilipin 1 mutants. Inhibitory activity of the SL-176 (1  $\mu$ M) against phosphatase activity of PPM1D with the phosphorylated perilipin 1 peptide. Data represents mean  $\pm$  S.D. of three independent experiments. Significance was analyzed by using Student t-test. \*\*\*  $p < 0.001$ .
